# Supplementary material for: Seed comparative genomics in three coffee species identify desiccation tolerance mechanisms in intermediate seeds
Source: PubMed Central journal article supplement — J Exp Bot. 2019 Nov 15;71(4):1418–33. doi: 10.1093/jxb/erz508 (PMC7031068; doi:10.1093/jxb/erz508), 2019-11-15
Supplement: erz508_suppl_supplementary_figure_s2.pdf [file erz508_suppl_supplementary_figure_s2.pdf]

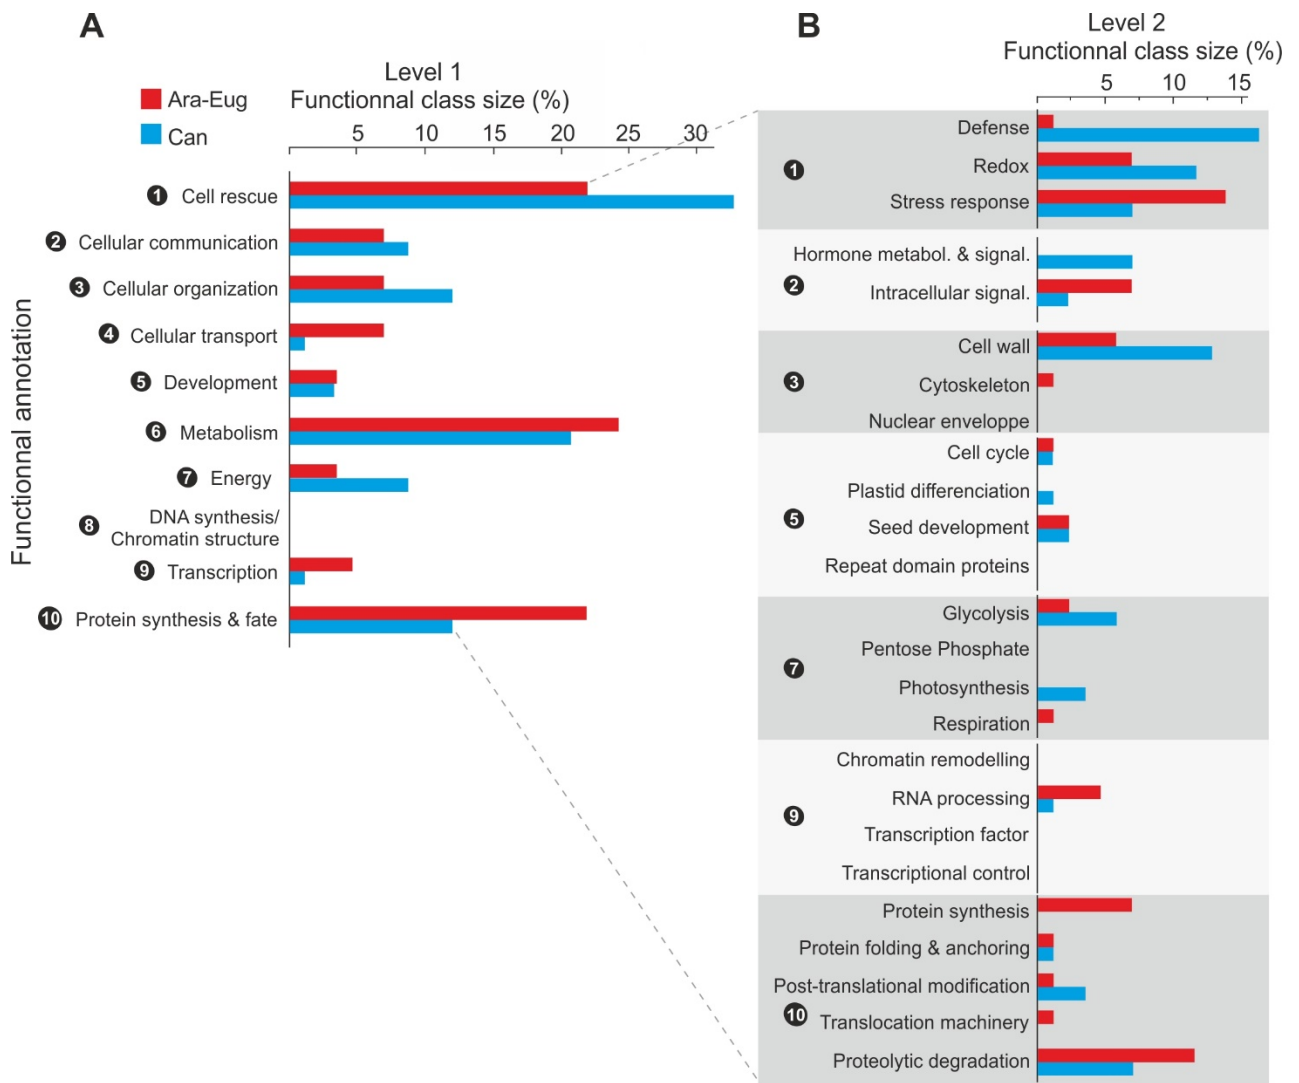

## Supplementary Figure S2

Functional enrichment of DT-related proteins. The percent of candidate proteins over-accumulated in mature DT (red) and DS (blue) seeds which belong to each functional class. A: The 1st level of functional terms; B: the 2nd level of functional terms.
